# Supplementary material for: A highly programmable platform for sequential release of protein therapeutics
Source: Royal Society of Chemistry journal article supplement (doi:10.1039/d0tb02657c), 2021-01-01
Supplement: d0tb02657c1.pdf [file d0tb02657c1.pdf]

## Supplementary information

### A highly programmable platform for sequential release of protein therapeutics

Haozheng Wang,<sup>a</sup> Rui Liu,<sup>a</sup> Sha Wang,<sup>a</sup> Ying Guan<sup>a,\*</sup> and Yongjun Zhang<sup>a,b,\*</sup>

<sup>a</sup> Key Laboratory of Functional Polymer Materials and State Key Laboratory of Medicinal Chemical Biology, Institute of Polymer Chemistry, College of Chemistry, Nankai University, Tianjin 300071, China.

<sup>b</sup> School of Material Science and Engineering, Tiangong University, Tianjin 300387, China

E-mail: yongjunzhang@nankai.edu.cn (YZ) and yingguan@nankai.edu.cn (YG).

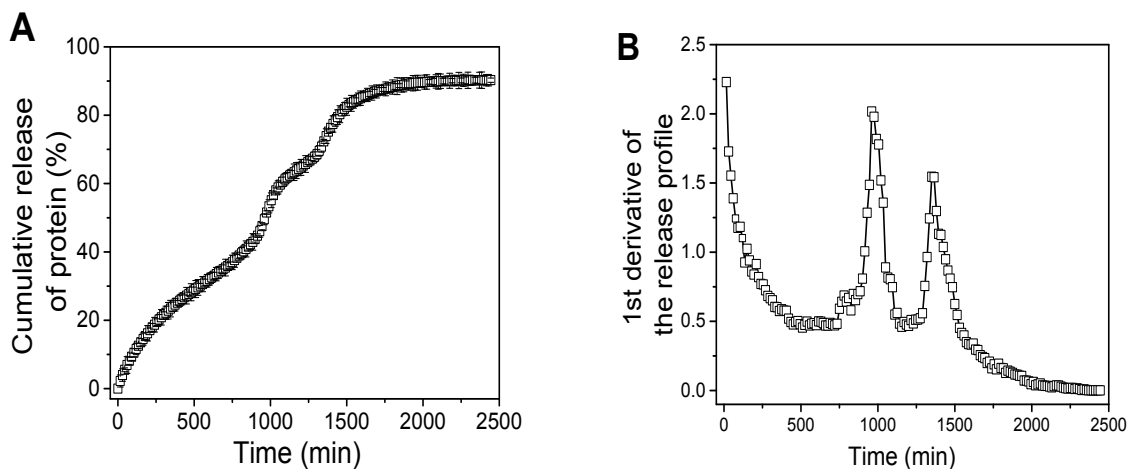

**Fig. S1.** (A) Release profiles of protein from a mixed sample of Cy5-IgG/CaCO<sub>3</sub>, TRITC-OVA/CaCO<sub>3</sub>/(TA/PEG)<sub>9</sub>, FITC-BSA/CaCO<sub>3</sub>/(TA/PEG)<sub>12</sub>. (B) 1st derivative of the release profiles.

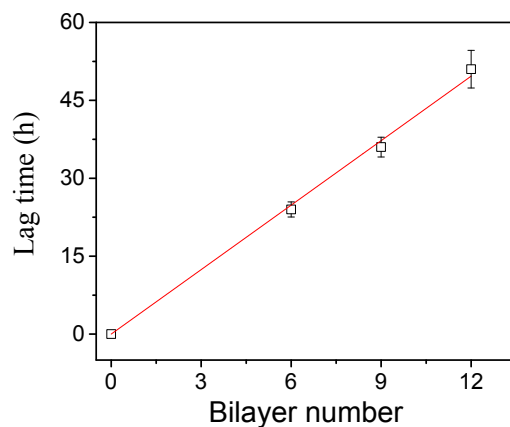

**Fig. S2.** The in vivo lag time of Cy5-BSA release as a function of bilayer number of TA/PEG coating.
